# Supplementary material for: The Relationships between HIV-1 Infection, History of Methamphetamine Use Disorder, and Soluble Biomarkers in Blood and Cerebrospinal Fluid
Source: MDPI journal article supplement (doi:10.3390/v13071287), 2021-07-01
Supplement: s1 [file s1]

Supplementary

**Table S1.** Demographic Information for Participants with CSF Samples.

|                                             | HIV-/METH-<br>( <i>n</i> =18)                                        | HIV-/METH+<br>( <i>n</i> =14)                                         | HIV+<br>/METH-<br>( <i>n</i> =22)                                     | HIV+<br>/METH+<br>( <i>n</i> =13)                                   | <i>P</i> value |
|---------------------------------------------|----------------------------------------------------------------------|-----------------------------------------------------------------------|-----------------------------------------------------------------------|---------------------------------------------------------------------|----------------|
| Age (years)                                 | 44.9 ± 16.2                                                          | 38.4 ± 12.1                                                           | 47.7 ± 16.4                                                           | 38.3 ± 8.3                                                          | <b>0.029</b>   |
| Sex (%)                                     | M: 61.1;<br>F: 38.9                                                  | M: 64.3;<br>F: 35.7                                                   | M: 95.4;<br>F: 4.5                                                    | M: 92.3;<br>F: 7.8                                                  | <b>0.016</b>   |
| Ethnicity (%)                               | Asian: 5.6<br>Afr Am: 11.1;<br>Hisp: 33.3;<br>Other: 0<br>Cauc: 50.0 | Asian: 0<br>Afr Am: 21.4;<br>Hisp: 7.1;<br>Other: 14.3;<br>Cauc: 57.1 | Asian: 0<br>Afr Am: 18.2;<br>Hisp: 18.2;<br>Other: 9.1;<br>Cauc: 54.5 | Asian: 0;<br>Afr Am: 7.7;<br>Hisp: 69.2;<br>Other: 0;<br>Cauc: 23.1 | NS             |
| Education (years)                           | 14.9 ± 1.6                                                           | 12.9 ± 2.7                                                            | 14.7 ± 2.4                                                            | 13.9 ± 2.5                                                          | <b>0.018</b>   |
| Age First METH use<br>(years)               | -                                                                    | 25.0 ± 11.4                                                           | -                                                                     | 24.6 ± 6.7                                                          | NS             |
| Days since last METH use<br>(days)          | -                                                                    | 276 ± 563                                                             | -                                                                     | 93 ± 126                                                            | NS             |
| Total quantity METH use<br>(grams)          | -                                                                    | 3654 ± 5507                                                           | -                                                                     | 2269 ± 2056                                                         | NS             |
| Current CD4+ Cell Count<br>(cells/uL)       | -                                                                    | -                                                                     | 801 ± 307                                                             | 651 ± 250                                                           | NS             |
| Estimated Duration HIV<br>Infection (years) | -                                                                    | -                                                                     | 15.1 ± 10.6                                                           | 7.4 ± 5.2                                                           | <b>0.021</b>   |
| Plasma HIV RNA <50 cop-<br>ies/mL (%)       | -                                                                    | -                                                                     | 95.5                                                                  | 84.6                                                                | NS             |
| Current ART Use (%)                         | -                                                                    | -                                                                     | 95.5                                                                  | 100                                                                 | NS             |

Data are presented as mean ± standard deviation unless otherwise noted. NS = not significantly different; ART: Anti-retroviral therapy.

**Table S2.** Summary of Plasma Biomarker Concentrations.

|                | HIV-/METH-  | HIV-/METH+  | HIV+<br>/METH- | HIV+<br>/METH+ | <i>P</i> value    | Risk (Cohen's <i>d</i> ) |
|----------------|-------------|-------------|----------------|----------------|-------------------|--------------------------|
| 8-iso-prostane | 0.53 ± 0.09 | 0.56 ± 0.10 | 0.58 ± 0.08    | 0.59 ± 0.09    | NS                |                          |
| 8-oxodG        | 0.63 ± 0.10 | 0.62 ± 0.06 | 0.65 ± 0.11    | 0.61 ± 0.09    | NS                |                          |
| CRP            | 0.20 ± 0.10 | 0.23 ± 0.12 | 0.26 ± 0.15    | 0.18 ± 0.12    | NS                |                          |
| D-dimer        | 0.36 ± 0.13 | 0.34 ± 0.15 | 0.37 ± 0.12    | 0.37 ± 0.15    | NS                |                          |
| ICAM1          | 0.45 ± 0.13 | 0.49 ± 0.11 | 0.48 ± 0.12    | 0.49 ± 0.14    | NS                |                          |
| IL-6           | 0.35 ± 0.10 | 0.36 ± 0.11 | 0.41 ± 0.14    | 0.32 ± 0.11    | <b>0.029</b>      | <b>METH: d=-0.36</b>     |
| IL-8           | 0.38 ± 0.16 | 0.36 ± 0.12 | 0.44 ± 0.13    | 0.47 ± 0.13    | <b>0.008</b>      | <b>HIV: d=0.47</b>       |
| CXCL10         | 0.30 ± 0.12 | 0.28 ± 0.11 | 0.38 ± 0.15    | 0.40 ± 0.14    | <b>&lt;0.0005</b> | <b>HIV: d=0.68</b>       |
| Ccl2           | 0.36 ± 0.15 | 0.36 ± 0.15 | 0.44 ± 0.17    | 0.48 ± 0.13    | <b>0.014</b>      | <b>HIV: d=0.40</b>       |
| MDA            | 0.44 ± 0.12 | 0.42 ± 0.14 | 0.44 ± 0.10    | 0.41 ± 0.08    | NS                |                          |
| sCD14          | 0.48 ± 0.15 | 0.46 ± 0.11 | 0.54 ± 0.12    | 0.52 ± 0.13    | <b>0.006</b>      | <b>HIV: d=0.45</b>       |
| sTNFR2         | 0.41 ± 0.15 | 0.42 ± 0.10 | 0.44 ± 0.15    | 0.46 ± 0.12    | NS                |                          |
| uPAR           | 0.43 ± 0.13 | 0.44 ± 0.15 | 0.46 ± 0.16    | 0.40 ± 0.11    | NS                |                          |
| VEGF           | 0.37 ± 0.14 | 0.36 ± 0.15 | 0.39 ± 0.14    | 0.43 ± 0.15    | NS                |                          |

Values represent the mean ± S.E.M. of the log transformed Z-scores of the raw biomarker data.

**Table S3.** Summary of CSF Biomarker Concentrations.

|                | HIV-/METH-  | HIV-/METH+  | HIV+<br>/METH- | HIV+<br>/METH+ | <i>P</i> value | Risk<br>(Cohen's <i>d</i> )             |
|----------------|-------------|-------------|----------------|----------------|----------------|-----------------------------------------|
| 8-iso-prostane | 0.31 ± 0.17 | 0.40 ± 0.16 | 0.45 ± 0.15    | 0.38 ± 0.11    | <b>0.017</b>   | <b>H+/M- &gt;<br/>H-/M-:<br/>d=0.80</b> |
| 8-oxodG        | 0.37 ± 0.17 | 0.33 ± 0.12 | 0.37 ± 0.16    | 0.33 ± 0.16    | NS             |                                         |
| CRP            | 0.29 ± 0.10 | 0.29 ± 0.21 | 0.35 ± 0.17    | 0.27 ± 0.09    | NS             |                                         |
| D-dimer        | 0.43 ± 0.13 | 0.45 ± 0.13 | 0.43 ± 0.13    | 0.41 ± 0.10    | NS             |                                         |
| ICAM1          | 0.28 ± 0.15 | 0.31 ± 0.16 | 0.38 ± 0.18    | 0.31 ± 0.14    | NS             |                                         |

|        |             |             |             |             |              |                                         |
|--------|-------------|-------------|-------------|-------------|--------------|-----------------------------------------|
| IL6    | 0.43 ± 0.11 | 0.47 ± 0.14 | 0.43 ± 0.14 | 0.39 ± 0.09 | NS           |                                         |
| IL8    | 0.40 ± 0.14 | 0.44 ± 0.14 | 0.52 ± 0.12 | 0.44 ± 0.10 | <b>0.042</b> | <b>H+/M- &gt;<br/>H-/M-:<br/>d=0.40</b> |
| CXCL10 | 0.27 ± 0.09 | 0.28 ± 0.14 | 0.38 ± 0.15 | 0.34 ± 0.17 | <b>0.008</b> | <b>HIV: d=0.60</b>                      |
| Ccl2   | 0.42 ± 0.17 | 0.42 ± 0.14 | 0.44 ± 0.15 | 0.41 ± 0.13 | NS           |                                         |
| MDA    | 0.28 ± 0.15 | 0.32 ± 0.11 | 0.33 ± 0.14 | 0.32 ± 0.11 | NS           |                                         |
| NFL    | 0.38 ± 0.13 | 0.35 ± 0.15 | 0.44 ± 0.18 | 0.34 ± 0.08 | NS           |                                         |
| sCD14  | 0.32 ± 0.12 | 0.34 ± 0.18 | 0.41 ± 0.19 | 0.32 ± 0.11 | NS           |                                         |
| sTNFR2 | 0.38 ± 0.14 | 0.39 ± 0.08 | 0.45 ± 0.16 | 0.39 ± 0.12 | NS           |                                         |
| uPAR   | 0.33 ± 0.16 | 0.32 ± 0.13 | 0.41 ± 0.19 | 0.37 ± 0.08 | NS           |                                         |
| VEGF   | 0.40 ± 0.14 | 0.52 ± 0.13 | 0.48 ± 0.15 | 0.44 ± 0.14 | NS           |                                         |

Values represent the mean ± S.E.M. of the log transformed Z-scores of the raw biomarker data.

**Table S4.** Factor Loadings of CSF Biomarkers.

|         | <b>Factor 1</b> | <b>Factor 2</b> | <b>Factor 3</b> | <b>Factor 4</b> |
|---------|-----------------|-----------------|-----------------|-----------------|
| ICAM1   | 0.831           |                 |                 |                 |
| uPAR    | 0.828           |                 |                 |                 |
| sTNFR2  | 0.796           |                 |                 |                 |
| sCD14   | 0.739           |                 |                 |                 |
| NFL     | 0.671           |                 |                 |                 |
| IL8     | 0.663           |                 |                 |                 |
| CXCL10  | 0.536           |                 |                 |                 |
| CRP     | 0.491           |                 |                 |                 |
| IL6     |                 | 0.825           |                 |                 |
| Ccl2    |                 | 0.681           |                 |                 |
| D-dimer |                 |                 | 0.804           |                 |
| 8-oxodG |                 |                 | 0.696           |                 |
| MDA     |                 |                 |                 | 0.815           |
| 8iso    |                 |                 |                 | 0.617           |

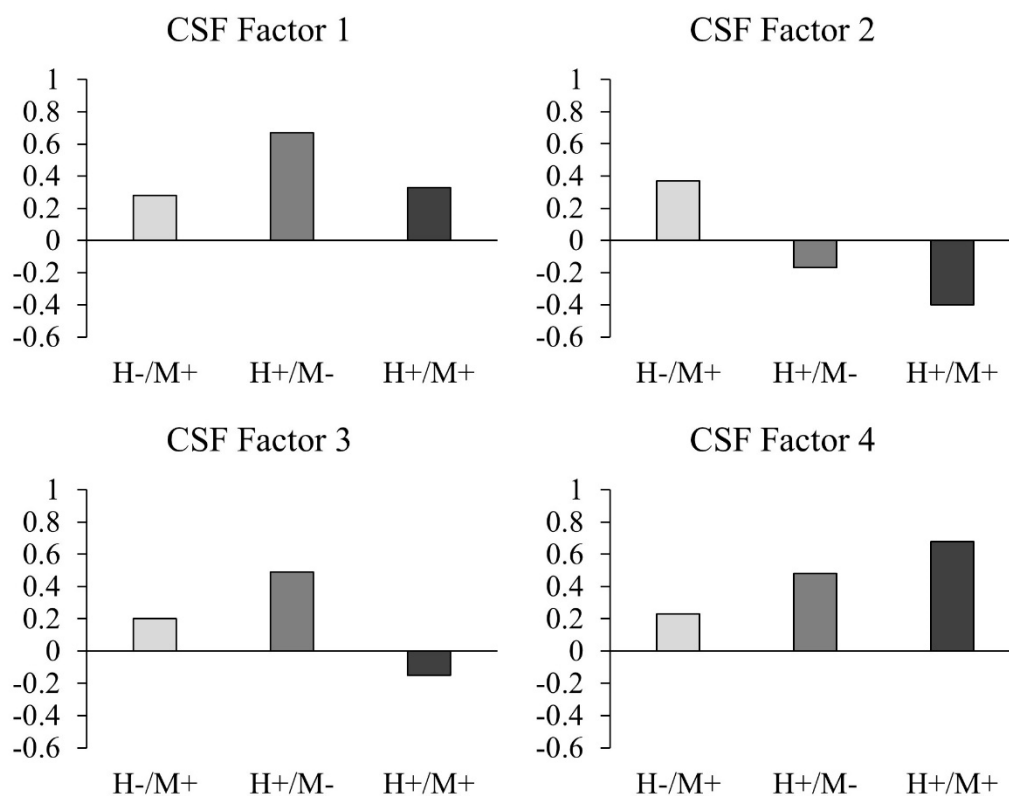

**Figure S1.** Effect Sizes of Each Group Compared to the HIV-/METH- Group for Each Plasma Factor. Effect sizes (using Cohen's d) were calculated for the HIV-/METH+, HIV+/METH-, and HIV+/METH+ group compared to the control (HIV-/METH-) group for each factor.
